# Supplementary material
Source: PubMed Central journal article supplement (PMC11181453)
Supplement: NIHPP2023.12.14.23299978v2-supplement-1.pdf [file NIHPP2023.12.14.23299978v2-supplement-1.pdf]

513 **SI A. Label changes in relation to vent settings changes**

514 Table A.3 shows that most vent settings changes are accompanied by changes in labels. However, very  
515 few phenotype label changes correspond to changes in vent settings. *Over 64% of ventilator settings changes*  
516 *are identified in label changes.* A larger proportion (>87%) are identified when limited to PEEP, tidal  
517 volume, and model changes, which induce significant waveforms changes compared with other settings such  
518 as mandatory breath rate (set\_rate). *Few (8%) identified changes in label, however, are directly associated*  
519 *in time with ventilator settings changes.*

Table A.3:  $N_s$  indicate the number of ventilator settings changes in set\_PEEP, set\_pttrigger, set\_qtrigger, set\_rate, set\_fio2, set\_ie, set\_flowpat, set\_mode, set\_vt, and vt\_set.  $N_l$  indicates the number of persistent label changes, counting those lasting longer than 30 seconds, to omit isolated transient changes and variability occurring as mixed-breath types (*e.g.*, FigB.7 during 11–14 hours, characterized by both alternation between labels #10 and #13 labels and changes in ML-identified VD type.) Column 's2l' indicates the percentage of vent settings changes that occur with a label change within 100 seconds. Column 'l2s' indicate the number of label changes that occur within 100 seconds of vent changes.

| ID  | $N_s$ | s2l (%) | $N_l$ | l2s (%) | ID          | $N_s$ | s2l (%) | $N_l$ | l2s (%) |
|-----|-------|---------|-------|---------|-------------|-------|---------|-------|---------|
| 101 | 45    | 73.33   | 66    | 16.67   | 129         | 11    | 45.45   | 138   | 3.62    |
| 102 | 1     | -       | 1     | -       | 130         | 14    | 85.71   | 296   | 6.42    |
| 103 | 2     | 100.00  | 35    | 8.57    | 131         | 10    | 70.00   | 25    | 20.00   |
| 104 | 25    | 36.00   | 356   | 1.97    | 133         | 37    | 78.38   | 154   | 18.83   |
| 105 | 1     | 100.00  | 46    | 4.35    | 134         | 76    | 5.26    | 175   | 0.57    |
| 107 | 99    | 56.57   | 288   | 9.72    | 135         | 104   | 86.54   | 695   | 6.47    |
| 108 | 20    | 75.00   | 342   | 2.92    | 136         | 222   | 59.01   | 590   | 6.78    |
| 110 | 3     | 33.33   | 73    | 1.37    | 137         | 137   | 54.01   | 166   | 14.46   |
| 111 | 23    | 78.26   | 328   | 7.01    | 138         | 10    | 60.00   | 38    | 21.05   |
| 112 | 59    | 45.76   | 177   | 6.21    | 139         | 24    | 70.83   | 451   | 3.99    |
| 113 | 14    | 78.57   | 260   | 6.15    | 140         | 47    | 100.00  | 629   | 1.75    |
| 114 | 48    | 29.17   | 50    | 24.00   | 141         | 73    | 45.21   | 431   | 7.42    |
| 115 | 0     | -       | 4     | 0       | 143         | 37    | 62.16   | 713   | 2.66    |
| 116 | 83    | 80.72   | 370   | 12.70   | 144         | 83    | 77.11   | 421   | 9.03    |
| 117 | 13    | 76.92   | 1000  | 1.40    | 145         | 50    | 62.00   | 380   | 8.42    |
| 119 | 51    | 98.04   | 265   | 8.30    | 146         | 220   | 42.27   | 650   | 9.38    |
| 120 | 57    | 40.35   | 246   | 8.94    | 149         | 39    | 25.64   | 296   | 4.73    |
| 123 | 18    | 88.89   | 460   | 3.91    | 150         | 12    | 75.00   | 424   | 2.12    |
|     |       |         |       |         | <i>mean</i> | 52    | 64.57   | 325   | 8.00    |

## 520 SI B. Individual Experiments, continued

521 This supplement continues illustrated examples of §3.1.

522 Figure B.6 panels a–d illustrate the analysis of Patient #103 whose data consists of 7 record hours with  
 523 one simple ventilator setting change. Only ventilator PEEP (a) is changed while there are three primary  
 524 behaviors identified (b,d). The reduction of PEEP occurs about 2 hours following a rise in early flow  
 525 limited breaths (eFL, panel c). This PEEP change (from 8 to 5 cmH<sub>2</sub>O) shifts peak pressure from 16 to 12  
 526 cm H<sub>2</sub>O for about an hour, at which time higher esophageal pressures returns. These breaths are identified as  
 527 normal (NL) [11]. Increased specificity may be pursued by local segmentation or other dimensional reduction  
 528 methods.

529 *A closer look at label 1 of patient #103:* The first principal component loadings (panel e, black) for LVS  
 530 descriptors over the first 5-hour period track the sequence of normal and eFL VD labels (f, shown as 5  
 531 minute statistics for clarity). Within the same breath phenotype (label 1), the *sign* of the component  
 532 loading statistically the eFL VD labels (AUROC=0.8718); high positive values are associated with eFL  
 533 breaths (f,g; green) where pressure maxima proceed volume maxima. These LVS variations result from  
 534 changes in the patient component, as there is no change of ventilator settings. Note that direct correlation  
 535 between continuous loading values on 10 second windows and statistical breath-wise binary VD label is not  
 536 well-defined while binary-to-binary comparison is.

537 The patient #113 (Figure B.7) dataset is nearly twice as long with again only one PEEP change occurring  
 538 after 10.5 hours of the 15.6 hour record. Breaths are stably identified as normal-type until about 8 hours,

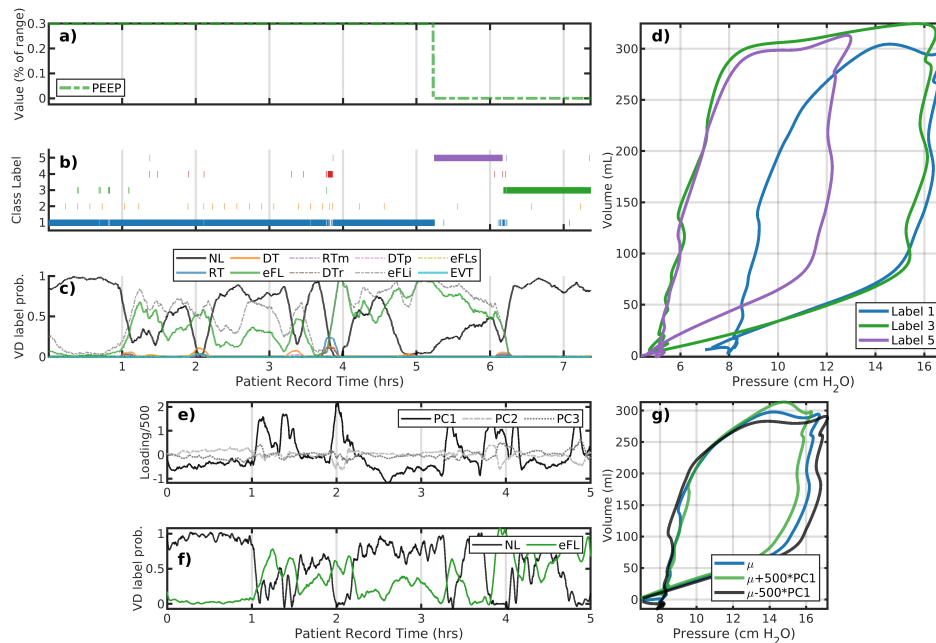

Figure B.6: Analysis of patient #103 LVS data (a–d) and the initial a 5-hour interval (e–g). Panels a–c correspond to changes in ventilator settings, segmentation labels, and identified VD type, respectively. The horizontal axis for these panels is the patient record time in hours. The panel (d) shows the model image of segmented data median parameters, which characterize the pV loops of breaths with that label (shown with the same color). Evolution of the LVS can be parsed pictorially from these figures. Large positive variations in the first principal component loading (e, black) for the initial 5-hour period align with VD labels indicating eFL type breaths (f) for this period. Specifically, this suggests discrimination of breaths shapes (g) can be differentiated using qualitatively criterion on local loadings or other segmentation.

539 occupying two cluster-identified similar breath shapes. This is followed briefly by eFL breaths and a transition  
 540 to a new characterization (label 8, light green) for about 30 minutes. In the following period (9–14 hours),  
 541 breaths are characterized by lower pressure maxima (label 10, gold); these are associated/identified with  
 542 reverse-trigger breaths (primarily RTm) and waveforms featuring pronounced inspiratory pressure drop.  
 543 The reduction in PEEP slightly increases the incidence of normal breaths during 11–14 hours although this  
 544 results in the more frequent appearance of shallow breaths (label 13, red).

545 *SI B.1. Intracluster normal and eFL in p111, label2*

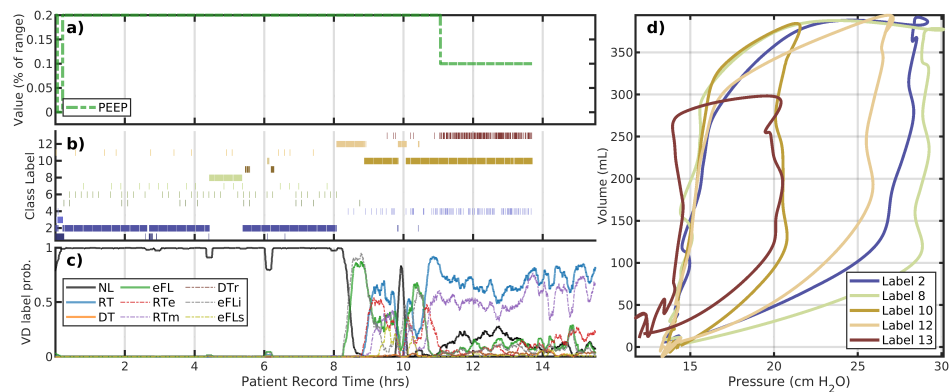

Figure B.7: The patient #113 evolution also includes only PEEP changed. The layout is the same as panels a–d of the previous figure. Under constant ventilator settings, breaths undergo transition several times including intervals of VD prior to PEEP change around 10.5 hours. A 1-hour long shift from label 2 to 8 occurs around 8 hours during which breaths decrease peak pressure and includes an increase in eFL and RT VD occurrence. After the PEEP change, breaths remain highly dyssynchronous and primarily centered around the characterization with label 10.

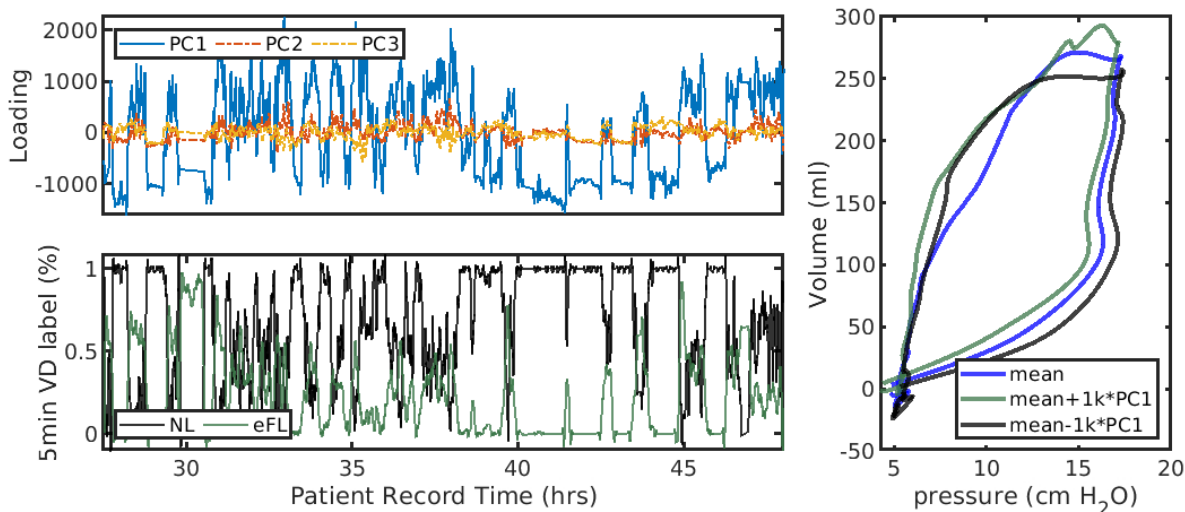

Figure B.8: The sign of PC1 loading roughly divides the VD classes in p111, label2. A threshold for the PC1 loading at zero roughly separates NL and eFL labels by 34%/65% and 85%/14%, respectively, with NL labels strongly associated with negative loadings. The optimal threshold ( $\sim 0.05$ ) offers only subtle improvement. The right panel illustrates low fidelity changes in the cluster median pV loop (blue) when modified by these negative (black, more associated with NL) and positive (green, eFL) loadings. Note that this involves comprising 10-second properties (representing typically  $\sim 3-4$  breaths) to breath-wise labels, and some representation errors thus arise from summarizing binary VD labels over all breaths intersecting a 10-second analysis window.

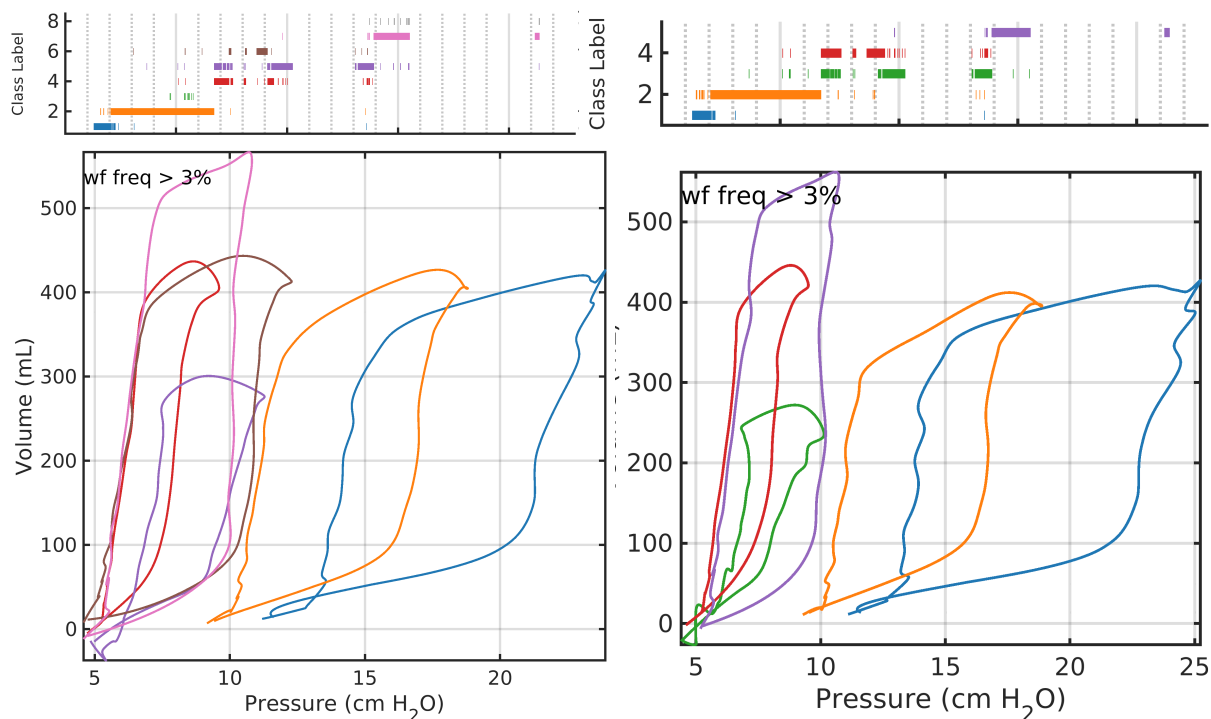

Figure B.9: Patient 101 clustering using tSNE (left) and UMAP (right) feature reduction stages, as an example. Temporal evolution of the LVS is qualitatively similar regardless of whether UMAP (neighbor size=5, minimum distance=0.01) or tSNE (exaggeration=20, perplexity=50, 5000 iterations) projection is used. DBSCAN parameter must also be adjusted as coordinate scales differ between the projections. For the plot shown, DBSCAN hyper-parameters ( $N_{pts}, \epsilon$ ) are (10,4) following tSNE and (4,1.5) following UMAP. Mild variations in pV characterizations result from medians of different point distributions.

### 547 SI C. Influence of Hyperparameter choices on cohort phenotypes

548 For each of the 721 individual phenotypes, feature vectors defined by the 5-number summaries of period,  
 549 PEEP, maxima of volume and pressure, ventilator settings, and estimated parameters of range-normalized  
 550 waveform were assembled from the population of LVS windows with a given label. Ventilator mode was  
 551 represented as a vector of percentages of each mode rather than a vector of binary categories, which eliminated  
 552 the need for the Gower distance. UMAP applied to these cohort feature vectors with the scaled-euclidean  
 553 metric produced a relatively stable point configuration across various hyper-parameter choices; 12 point  
 554 neighborhoods (2% of data) with a minimum distance of 1 unit were adopted as values. Identified groups  
 555 were more sensitive to DBSCAN labeling hyper-parameters. Figure C.10a shows the possibilities of different  
 556 groupings based on the search neighborhood size ( $\epsilon$ ). Subsequent results in the main section employ a  
 557 hyper-parameter choice at the 'knee-point' [39] to balance generalizability and specificity. A more specific  
 558 labeling ( $\epsilon = 2.5$ ) shown in panel b, is qualitatively similar to that of main text.

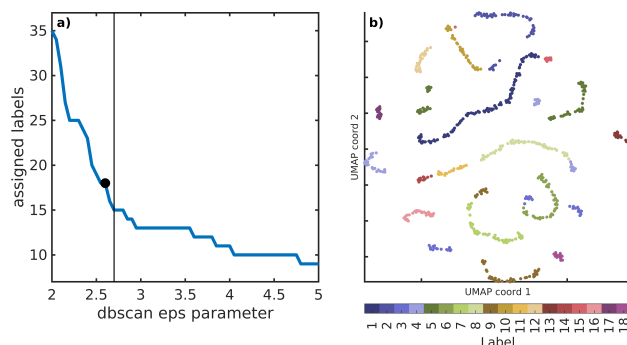

Figure C.10: DBSCAN search radius ( $\varepsilon$ ) *v.* the number of identified groups. The black line indicates  $\varepsilon = 2.7$  selected for cohort clustering. Choices of  $\varepsilon \in [2.67, 2.82]$  yield equivalent results following increased granularity of groupings at  $\varepsilon$  lower values.

Table C.4: The equivalent of Table2 for the alternate choice of hyper-parameter  $\varepsilon = 2.5$

| Label | Total% | $N_{\text{pat}}$ | $N_{\text{pheno}}$ | $p_{\text{min}}$ | $p_{\text{drive}}$ | $V_{\text{max}}$ | dp/dV    | MV mode   |
|-------|--------|------------------|--------------------|------------------|--------------------|------------------|----------|-----------|
| 1     | 15.5   | 11               | 101                | 8                | 12.7[4.1]          | 7.9[1.3]         | 1.5[0.4] | APVCMV    |
| 2     | 11.4   | 16               | 52                 | 12               | 13.3[3.6]          | 6.2[2.1]         | 2.3[1.2] | PCMV*     |
| 3     | 8.4    | 5                | 37                 | 10               | 13.5[1.9]          | 6.5[0.3]         | 2.1[0.4] | APVCMV*   |
| 4     | 7.7    | 8                | 45                 | 14               | 12.6[2.9]          | 6.2[1.3]         | 1.9[0.7] | APVCMV    |
| 5     | 6.9    | 11               | 58                 | 16               | 13.4[2.3]          | 6.0[0.6]         | 2.2[0.6] | APVCMV    |
| 6     | 6.3    | 7                | 49                 | 11               | 16.6[12.5]         | 5.9[0.7]         | 3.4[2.4] | APVCMV    |
| 7     | 6.2    | 6                | 49                 | 8                | 11.1[1.4]          | 6.6[1.0]         | 1.7[0.2] | APVCMV    |
| 8     | 6.2    | 23               | 56                 | 10               | 12.1[3.7]          | 6.3[1.0]         | 1.9[0.6] | APVCMV    |
| 9     | 6.2    | 10               | 51                 | 14               | 21.3[9.5]          | 5.6[1.8]         | 3.7[3.1] | APVCMV    |
| 10    | 4.1    | 12               | 34                 | 14               | 12.2[6.9]          | 5.9[0.2]         | 2.0[1.3] | APVCMV*   |
| 11    | 4.0    | 14               | 20                 | 5                | 8.9[4.1]           | 7.0[2.4]         | 1.2[0.8] | APVCMV    |
| 12    | 3.7    | 16               | 25                 | 12               | 14.3[3.2]          | 6.0[0.4]         | 2.3[0.9] | PCMV**    |
| 13    | 3.4    | 17               | 22                 | 11               | 13.1[2.9]          | 6.2[1.3]         | 2.1[0.5] | APVCMV*** |
| 14    | 3.3    | 11               | 12                 | 8                | 9.7[2.7]           | 6.8[1.5]         | 1.6[0.4] | APVCMV    |
| 15    | 2.5    | 8                | 10                 | 12               | 15.1[12.5]         | 5.9[0.1]         | 2.4[2.2] | APVCMV    |
| 16    | 1.7    | 11               | 27                 | 14               | 13.3[2.9]          | 6.0[1.3]         | 2.0[0.8] | APVCMV    |
| 17    | 1.5    | 9                | 14                 | 16               | 15.9[6.0]          | 5.9[2.8]         | 2.6[2.4] | APVCMV    |
| 18    | 1.1    | 5                | 16                 | 5                | 10.7[0.2]          | 6.5[0.7]         | 1.7[0.2] | APVCMV    |
